# Supplementary material for: Enhanced meaning in life following psychedelic use: converging evidence from controlled and naturalistic studies
Source: Frontiers journal article supplement (doi:10.3389/fpsyg.2025.1580663), 2025-06-06
Supplement: Data_Sheet_1.pdf [file Data_Sheet_1.pdf]

## ***Supplementary Material***

### **1 SUPPLEMENTARY DATA**

#### **1.1 Tables**

| <b>Item</b>                                                              | <b>Subscale</b> |
|--------------------------------------------------------------------------|-----------------|
| I understand my life's meaning.                                          | Presence        |
| I am looking for something that makes my life feel meaningful.           | Search          |
| I am always looking to find my life's purpose.                           | Search          |
| My life has a clear sense of purpose.                                    | Presence        |
| I have a good sense of what makes my life meaningful.                    | Presence        |
| I have discovered a satisfying life purpose.                             | Presence        |
| I am always searching for something that makes my life feel significant. | Search          |
| I am seeking a purpose or mission for my life.                           | Search          |
| My life has no clear purpose.                                            | Presence        |
| I am searching for meaning in my life.                                   | Search          |

**Table S1.** The Meaning in Life Questionnaire (MLQ) as used in the three studies. Items are rated from 1 (Absolutely untrue) to 7 (Absolutely true) giving a minimum score of 5 and a maximum score of 35 on each of the subscales. Item 9 is reverse-coded.

|                              | Ceremony                                                                                                                                                                                      | Insight                                                | Psilodep                           |
|------------------------------|-----------------------------------------------------------------------------------------------------------------------------------------------------------------------------------------------|--------------------------------------------------------|------------------------------------|
| Sample size                  | 886                                                                                                                                                                                           | 28                                                     | 59                                 |
| Gender (%)                   | Male: 51.4<br>Female: 40.5<br>Other: 0.6<br>NA: 7.6                                                                                                                                           | Male: 57.1<br>Female: 42.9                             | Male: 66.1<br>Female: 33.9         |
| Age (mean +/- SD)            | 44.4 ± 12.6                                                                                                                                                                                   | 40.6 ± 8.7                                             | 41.2 ± 11.7                        |
| Education (%)                | None: 0.7<br>High School or equivalent (GED): 7.0<br>Associate / Technical Degree: 6.5<br>College diploma: 28.2<br>Master's degree: 31.0<br>Doctorate or professional degree: 19.0<br>NA: 7.6 | Secondary School Level: 42.9<br>University Level: 57.1 | University level education: 76.3   |
| Ethnicity (%)                | White: 83.9<br>Black: 1.4<br>Asian: 5.4<br>American Indian / Alaska native: 0.3<br>Unknown: 1.2<br>Prefer not to say: 2.6<br>NA: 7.6                                                          | Caucasian: 85.7<br>Undisclosed: 10.7<br>Black: 3.6     | White: 88.1                        |
| Previous psychedelic use (%) | No: 37.2<br>Yes: 55.2<br>NA: 7.6                                                                                                                                                              | No: 100                                                | No psilocybin use: 72.9            |
| Psychiatric history (%)      | No diagnoses: 60.8<br>At least one lifetime diagnosis: 30.6<br>NA: 7.6                                                                                                                        | Healthy: 100                                           | Moderate-to-severe depression: 100 |

**Table S2.** Demographic information for the three samples analysed in the study.
